# Supplementary material for: Effects of Milk Polar Lipids on DSS-Induced Colitis Severity Are Dependent on Dietary Fat Content
Source: MDPI journal article supplement (doi:10.3390/nu14235145), 2022-12-03
Supplement: s1 [file s1]

**Table S4. Top 50 Features from Lipidomics Analysis**

| <b>Lipid Species</b>                      | <b>f.value</b> | <b>p.value</b> | <b>-LOG10(p)</b> | <b>FDR</b> | <b>Fisher's LSD</b>                                             |
|-------------------------------------------|----------------|----------------|------------------|------------|-----------------------------------------------------------------|
| <b>Cer 37:1;2O Cer 19:1;2O/18:0</b>       | 130.93         | 3.88E-07       | 6.4117           | 0.00030366 | HFD2 - HFD0; LFD2 - HFD0; HFD2 - LFD0; HFD2 - LFD2; LFD2 - LFD0 |
| <b>Cer 41:0;2O Cer 18:0;2O/23:0</b>       | 107.29         | 8.43E-07       | 6.0742           | 0.00030366 | HFD2 - HFD0; LFD2 - HFD0; HFD2 - LFD0; LFD2 - LFD0              |
| <b>Cer 43:1;4O Cer 28:0;3O/15:1;(2OH)</b> | 98.288         | 1.19E-06       | 5.9262           | 0.00030366 | HFD2 - HFD0; LFD2 - HFD0; HFD2 - LFD0; LFD2 - LFD0              |
| <b>Cer 40:0;2O</b>                        | 97.173         | 1.24E-06       | 5.9069           | 0.00030366 | HFD2 - HFD0; LFD2 - HFD0; HFD2 - LFD0; LFD2 - LFD0              |
| <b>Cer 39:0;2O Cer 16:0;2O/23:0</b>       | 86.74          | 1.92E-06       | 5.7157           | 0.00030366 | HFD2 - HFD0; LFD2 - HFD0; HFD2 - LFD0; LFD2 - LFD0              |
| <b>Cer 40:0;2O Cer 16:0;2O/24:0</b>       | 84.701         | 2.11E-06       | 5.6758           | 0.00030366 | HFD2 - HFD0; LFD2 - HFD0; HFD2 - LFD0; LFD2 - LFD0              |
| <b>SM 42:1;2O</b>                         | 81.79          | 2.41E-06       | 5.6171           | 0.00030366 | HFD2 - HFD0; LFD0 - HFD0; LFD2 - HFD0; HFD2 - LFD0; LFD2 - LFD0 |
| <b>Cer 42:1;2O Cer 18:1;2O/24:0</b>       | 78.619         | 2.81E-06       | 5.5509           | 0.00030366 | HFD2 - HFD0; LFD2 - HFD0; HFD2 - LFD0; LFD2 - LFD0              |
| <b>Cer 40:1;2O</b>                        | 76.223         | 3.17E-06       | 5.4991           | 0.00030366 | HFD2 - HFD0; LFD2 - HFD0; HFD2 - LFD0; LFD2 - LFD0              |
| <b>Cer 43:4;3O Cer 28:2;3O/15:2</b>       | 73.847         | 3.58E-06       | 5.4461           | 0.00030366 | HFD2 - HFD0; LFD2 - HFD0; HFD2 - LFD0; LFD2 - LFD0              |
| <b>Cer 42:2;3O Cer 18:1;2O/24:1;O</b>     | 73.096         | 3.72E-06       | 5.4291           | 0.00030366 | HFD2 - HFD0; LFD2 - HFD0; HFD2 - LFD0; LFD2 - LFD0              |
| <b>Cer 39:1;2O</b>                        | 71.995         | 3.95E-06       | 5.4037           | 0.00030366 | HFD2 - HFD0; LFD2 - HFD0; HFD2 - LFD0; LFD2 - LFD0              |

|                                           |        |          |        |            |                                                                    |
|-------------------------------------------|--------|----------|--------|------------|--------------------------------------------------------------------|
| <b>Cer 43:3;4O Cer 21:3;3O/22:0;(2OH)</b> | 71.059 | 4.15E-06 | 5.3819 | 0.00030366 | HFD2 - HFD0; LFD0 - HFD0; LFD2 - HFD0;<br>HFD2 - LFD0; LFD2 - LFD0 |
| <b>Cer 41:1;2O Cer 18:1;2O/23:0</b>       | 70.717 | 4.23E-06 | 5.3738 | 0.00030366 | HFD2 - HFD0; LFD2 - HFD0; HFD2 - LFD0;<br>LFD2 - LFD0              |
| <b>Cer d40:0</b>                          | 69.807 | 4.44E-06 | 5.3522 | 0.00030366 | HFD2 - HFD0; LFD2 - HFD0; HFD2 - LFD0;<br>LFD2 - LFD0              |
| <b>Cer 42:3;4O Cer 19:3;3O/23:0;(2OH)</b> | 64.235 | 6.11E-06 | 5.2138 | 0.00035448 | HFD2 - HFD0; LFD2 - HFD0; HFD2 - LFD0;<br>LFD2 - LFD0              |
| <b>Cer d41:1</b>                          | 63.346 | 6.45E-06 | 5.1907 | 0.00035448 | HFD2 - HFD0; LFD2 - HFD0; HFD2 - LFD0;<br>LFD2 - LFD0              |
| <b>SM d42:0</b>                           | 63.256 | 6.48E-06 | 5.1883 | 0.00035448 | HFD2 - HFD0; LFD0 - HFD0; LFD2 - HFD0;<br>HFD2 - LFD0; LFD2 - LFD0 |
| <b>Cer 41:2;2O Cer 18:1;2O/23:1</b>       | 62.987 | 6.59E-06 | 5.1812 | 0.00035448 | HFD2 - HFD0; LFD2 - HFD0; HFD2 - LFD0;<br>LFD2 - LFD0              |
| <b>Cer 42:0;2O</b>                        | 61.304 | 7.31E-06 | 5.1363 | 0.00035448 | HFD2 - HFD0; LFD2 - HFD0; HFD2 - LFD0;<br>LFD2 - LFD0              |
| <b>Cer d39:1</b>                          | 61.042 | 7.43E-06 | 5.1292 | 0.00035448 | HFD2 - HFD0; LFD2 - HFD0; HFD2 - LFD0;<br>LFD2 - LFD0              |
| <b>Cer 43:3;3O Cer 18:2;2O/25:1;O</b>     | 59.715 | 8.08E-06 | 5.0928 | 0.00035448 | HFD2 - HFD0; LFD2 - HFD0; HFD2 - LFD0;<br>LFD2 - LFD0              |
| <b>Cer 38:0;2O Cer 16:0;2O/22:0</b>       | 59.337 | 8.27E-06 | 5.0823 | 0.00035448 | HFD2 - HFD0; LFD2 - HFD0; HFD2 - LFD0;<br>LFD2 - LFD0              |
| <b>Cer 39:2;2O Cer 16:1;2O/23:1</b>       | 59.288 | 8.30E-06 | 5.0809 | 0.00035448 | HFD2 - HFD0; LFD2 - HFD0; HFD2 - LFD0;<br>LFD2 - LFD0              |
| <b>PS 39:1 PS 21:0_18:1</b>               | 57.838 | 9.12E-06 | 5.04   | 0.00037393 | HFD2 - HFD0; HFD0 - LFD0; HFD0 - LFD2;<br>HFD2 - LFD0; HFD2 - LFD2 |

|                                           |        |          |        |            |                                                                                 |
|-------------------------------------------|--------|----------|--------|------------|---------------------------------------------------------------------------------|
| <b>Cer 37:0;2O Cer 16:0;2O/21:0</b>       | 53.876 | 1.19E-05 | 4.9229 | 0.00043983 | HFD2 - HFD0; LFD2 - HFD0; HFD2 - LFD0;<br>LFD2 - LFD0                           |
| <b>Cer 39:1;2O Cer 16:1;2O/23:0</b>       | 53.344 | 1.24E-05 | 4.9065 | 0.00043983 | HFD2 - HFD0; LFD2 - HFD0; HFD2 - LFD0;<br>LFD2 - LFD0                           |
| <b>Cer d38:1</b>                          | 53.071 | 1.26E-05 | 4.8981 | 0.00043983 | HFD2 - HFD0; LFD2 - HFD0; HFD2 - LFD0;<br>LFD2 - LFD0                           |
| <b>Cer d43:1</b>                          | 52.124 | 1.35E-05 | 4.8685 | 0.00043983 | HFD2 - HFD0; LFD2 - HFD0; HFD2 - LFD0;<br>LFD2 - LFD0                           |
| <b>Cer d42:0</b>                          | 52.11  | 1.36E-05 | 4.868  | 0.00043983 | HFD2 - HFD0; LFD2 - HFD0; HFD2 - LFD0;<br>LFD2 - LFD0                           |
| <b>Cer 38:1;2O Cer 18:1;2O/20:0</b>       | 51.724 | 1.39E-05 | 4.8558 | 0.00043983 | HFD2 - HFD0; LFD2 - HFD0; HFD2 - LFD0;<br>LFD2 - LFD0                           |
| <b>Cer d33:1</b>                          | 51.672 | 1.40E-05 | 4.8542 | 0.00043983 | HFD2 - HFD0; LFD2 - HFD0; HFD2 - LFD0;<br>HFD2 - LFD2; LFD2 - LFD0              |
| <b>Cer 42:3;3O Cer 18:1;2O/24:2;O</b>     | 51.444 | 1.42E-05 | 4.8469 | 0.00043983 | HFD2 - HFD0; LFD2 - HFD0; HFD2 - LFD0;<br>LFD2 - LFD0                           |
| <b>Cer 41:1;3O Cer 18:1;2O/23:0;(2OH)</b> | 50.947 | 1.48E-05 | 4.831  | 0.00043983 | HFD2 - HFD0; LFD2 - HFD0; HFD2 - LFD0;<br>LFD2 - LFD0                           |
| <b>Cer 43:1;2O</b>                        | 50.217 | 1.56E-05 | 4.8073 | 0.00043983 | HFD2 - HFD0; LFD2 - HFD0; HFD2 - LFD0;<br>LFD2 - LFD0                           |
| <b>Cer d40:1</b>                          | 50.12  | 1.57E-05 | 4.8041 | 0.00043983 | HFD2 - HFD0; LFD2 - HFD0; HFD2 - LFD0;<br>LFD2 - LFD0                           |
| <b>Cer 39:1;4O</b>                        | 49.972 | 1.59E-05 | 4.7992 | 0.00043983 | HFD2 - HFD0; LFD2 - HFD0; HFD2 - LFD0;<br>LFD2 - LFD0                           |
| <b>Cer 30:0;2O</b>                        | 48.016 | 1.85E-05 | 4.7338 | 0.00049789 | HFD2 - HFD0; HFD0 - LFD0; LFD2 - HFD0;<br>HFD2 - LFD0; HFD2 - LFD2; LFD2 - LFD0 |

|                                           |        |          |        |            |                                                                                 |
|-------------------------------------------|--------|----------|--------|------------|---------------------------------------------------------------------------------|
| <b>Cer d32:1</b>                          | 47.604 | 1.91E-05 | 4.7197 | 0.00050113 | HFD2 - HFD0; LFD2 - HFD0; HFD2 - LFD0;<br>HFD2 - LFD2; LFD2 - LFD0              |
| <b>SM 44:1;2O</b>                         | 45.46  | 2.27E-05 | 4.6444 | 0.00057612 | HFD2 - HFD0; LFD0 - HFD0; LFD2 - HFD0;<br>HFD2 - LFD0; LFD2 - LFD0              |
| <b>Cer d44:1</b>                          | 44.874 | 2.38E-05 | 4.6233 | 0.00057612 | HFD2 - HFD0; LFD2 - HFD0; HFD2 - LFD0;<br>LFD2 - LFD0                           |
| <b>Cer 38:2;2O</b>                        | 44.733 | 2.41E-05 | 4.6181 | 0.00057612 | HFD2 - HFD0; HFD0 - LFD0; LFD2 - HFD0;<br>HFD2 - LFD0; LFD2 - LFD0              |
| <b>Cer d42:1</b>                          | 44.695 | 2.42E-05 | 4.6167 | 0.00057612 | HFD2 - HFD0; LFD2 - HFD0; HFD2 - LFD0;<br>LFD2 - LFD0                           |
| <b>Cer 40:0;3O</b>                        | 43.231 | 2.74E-05 | 4.5625 | 0.00062249 | HFD2 - HFD0; LFD2 - HFD0; HFD2 - LFD0;<br>LFD2 - LFD0                           |
| <b>Cer 30:1;2O</b>                        | 43.16  | 2.76E-05 | 4.5599 | 0.00062249 | HFD2 - HFD0; HFD0 - LFD0; HFD2 - LFD0;<br>HFD2 - LFD2; LFD2 - LFD0              |
| <b>SM 41:0;2O (1)</b>                     | 42.944 | 2.81E-05 | 4.5517 | 0.00062249 | HFD2 - HFD0; LFD0 - HFD0; LFD2 - HFD0;<br>HFD2 - LFD0; LFD2 - LFD0              |
| <b>Cer 48:3;4O Cer 33:2;3O(FA 15:0)</b>   | 42.754 | 2.85E-05 | 4.5445 | 0.00062249 | HFD2 - HFD0; LFD2 - HFD0; HFD2 - LFD0;<br>LFD2 - LFD0                           |
| <b>PC 34:0 (1)</b>                        | 42.28  | 2.98E-05 | 4.5264 | 0.00063549 | HFD2 - HFD0; LFD0 - HFD0; LFD2 - HFD0;<br>HFD2 - LFD0; LFD2 - LFD0              |
| <b>Cer 41:0;4O Cer 18:0;3O/23:0;(2OH)</b> | 41.817 | 3.10E-05 | 4.5085 | 0.00064869 | HFD2 - HFD0; LFD2 - HFD0; HFD2 - LFD0;<br>LFD2 - LFD0                           |
| <b>Cer d36:1</b>                          | 40.929 | 3.36E-05 | 4.4737 | 0.00068877 | HFD2 - HFD0; HFD0 - LFD0; LFD2 - HFD0;<br>HFD2 - LFD0; HFD2 - LFD2; LFD2 - LFD0 |
