# Supplementary material for: Effects of Milk Polar Lipids on DSS-Induced Colitis Severity Are Dependent on Dietary Fat Content
Source: MDPI journal article supplement (doi:10.3390/nu14235145), 2022-12-03
Supplement: s1 [file s1]

**Table S3. Sum of Lipid Classes ANOVA**

| <b>Lipid Class</b>             | <b>f.value</b> | <b>p.value</b> | <b>-LOG10(p)</b> | <b>FDR</b> | <b>Fisher's LSD</b>                                             |
|--------------------------------|----------------|----------------|------------------|------------|-----------------------------------------------------------------|
| <b>Ceramides</b>               | 36.63          | 5.07E-05       | 4.2946           | 0.0010312  | HFD2 - HFD0; LFD2 - HFD0; HFD2 - LFD0; LFD2 - LFD0              |
| <b>Sphingomyelin</b>           | 31.38          | 8.9666E-05     | 4.0474           | 0.0010312  | HFD2 - HFD0; LFD0 - HFD0; LFD2 - HFD0; HFD2 - LFD0; LFD2 - LFD0 |
| <b>Lysophosphatidylserines</b> | 14.412         | 0.0013682      | 2.8639           | 0.010489   | HFD2 - HFD0; LFD2 - HFD0; HFD2 - LFD0; LFD2 - LFD0              |
