# Supplementary material for: Effects of Milk Polar Lipids on DSS-Induced Colitis Severity Are Dependent on Dietary Fat Content
Source: MDPI journal article supplement (doi:10.3390/nu14235145), 2022-12-03
Supplement: s1 [file s1]

**Table S1. PCR Primer Sequences**

| <b>Gene</b>   | <b>Forward (5' → 3')</b>  | <b>Reverse (5' → 3')</b> |
|---------------|---------------------------|--------------------------|
| <i>Acod1</i>  | AGTTTTCTGGCCTCGACCTG      | AGAGGGAGGGTGGGAATCTCT    |
| <i>Actb</i>   | CGATGCCCTGAGGCTCTTT       | TGGATGCCACAGGATTCCA      |
| <i>Arg1</i>   | TTCTCAAAGGACAGCCTCG       | CAGACCGTGGGTCTTCACA      |
| <i>Cxcl1</i>  | TGCACCCAAACCGAAGTCAT      | CTCCGGTTACTTGGGGACACC    |
| <i>Cxcl5</i>  | TGCCCTACGGTGGAAGTCAT      | AGCTTTCTTTTGTCACTGCC     |
| <i>Gapdh</i>  | TGTGTCCGTCGTGGATCTGA      | CCTGCTTCACCACCTTCTTGAT   |
| <i>Hdc</i>    | ATGGAGCCCTGTGAATACCG      | TGTAATCCACCATCTCTTCCCTCT |
| <i>Il1a</i>   | GTCGGGAGGAGACGACTCTAA     | GTTTCTGGCAACTCCTTCAGC    |
| <i>Il1b</i>   | GTCACAAGAAACCATGGCACAT    | GCCCATCAGAGGCAAGGA       |
| <i>Il6</i>    | CTGCAAGAGACTTCCATCCAGTT   | AGGGAAGGCCGTGGTTGT       |
| <i>Itln1</i>  | ATCATGGTTGCTACCAGAGGTTG   | CAGGAAATAGAGACCATCTTGTC  |
| <i>Lcn2</i>   | CCACCACGGACTACAACCAG      | AGCTCCTTGTTCTTCCATACA    |
| <i>Mmp3</i>   | AGTCCCTCTATGGAACCTCC      | AGATTGCGCCAAAAGTGCC      |
| <i>Rplp0</i>  | CCTGAAGTGCTCGACATCAC      | CCACAGACAATGCCAGGAC      |
| <i>S100a8</i> | GTCCTCAGTTTGTGCAGAAATAAAA | GGCCAGAAGCTCTGCTACTC     |
| <i>S100a9</i> | TGGGCTTACACTGCTCTTACC     | GGTTATGCTGCGCTCCATCT     |
| <i>Tnf</i>    | CTCTTCTGTCTACTGAAC        | AAGATGATCTGAGTGTGA       |
